# Supplementary material for: Theoretical insight into the essential role of charged surface for ammonia synthesis: Si-decorated carbon nitride electrode
Source: Royal Society of Chemistry journal article supplement (doi:10.1039/d3cp03279e), 2023-01-01
Supplement: d3cp03279e1.pdf [file d3cp03279e1.pdf]

## *Supporting Information*

### **Theoretical insight into the essential role of charged surface for ammonia synthesis: Si-decorated carbon nitride electrode**

Lei Yang, Jiake Fan, Weihua Zhu\*

*Institute for Computation in Molecular and Materials Science, School of Chemistry and Chemical  
Engineering, Nanjing University of Science and Technology, Nanjing 210094, China*

**Figure S1.** The Mulliken charge analysis.

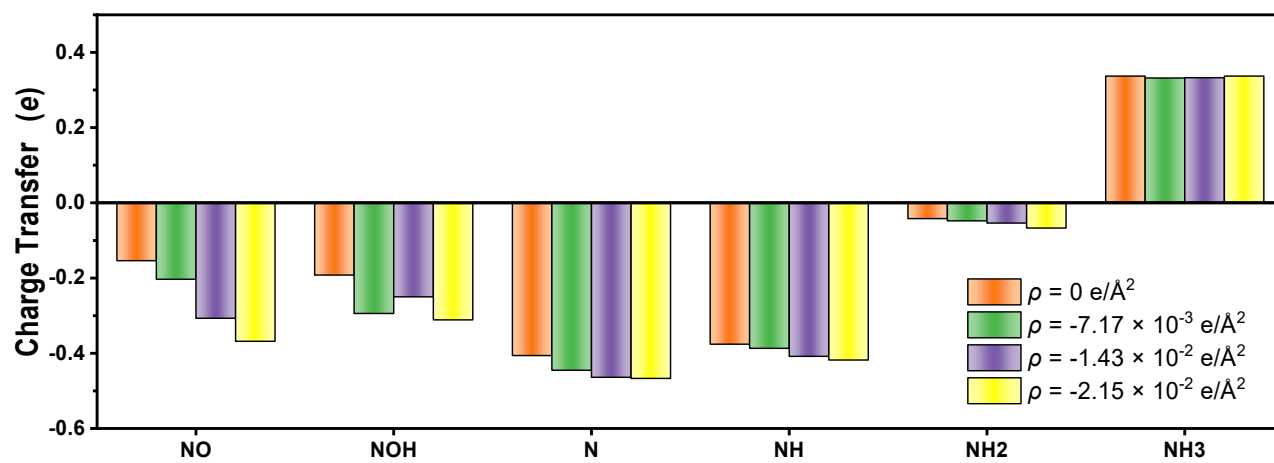

**Table S1.** The convergence tests for functional and  $k$ -point mesh.

|      | $6\times 6\times 1$ | $7\times 7\times 1$ | $8\times 8\times 1$ | $9\times 9\times 1$ |
|------|---------------------|---------------------|---------------------|---------------------|
| PW91 | -1439.5663765       | -1439.5663739       | -1439.5663739       | -1439.5663742       |
| PBE  | -1438.4750849       | -1438.4750823       | -1438.4750822       | -1438.4750825       |
| RPBE | -1440.2510039       | -1440.2510009       | -1440.2510011       | -1440.2510014       |
